# Supplementary material for: A Dpagt1 Missense Variant Causes Degenerative Retinopathy without Myasthenic Syndrome in Mice
Source: MDPI journal article supplement (doi:10.3390/ijms231912005), 2022-10-09
Supplement: s1 [file s1]

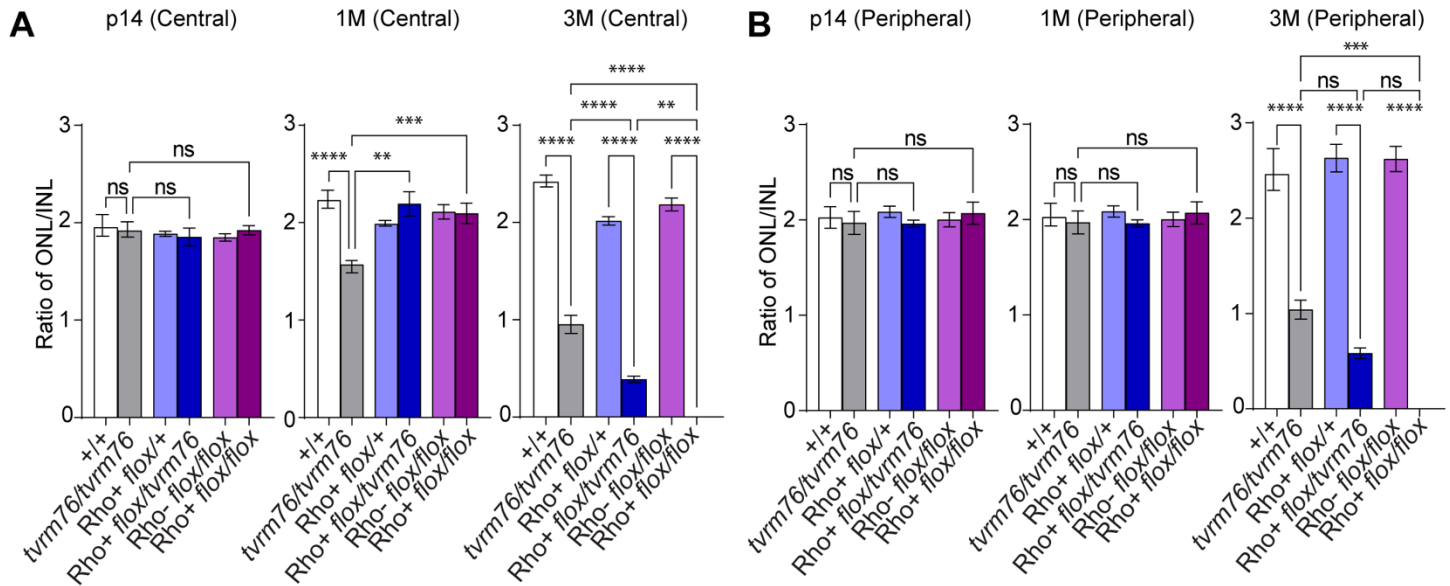

**Figure S1.** Photoreceptor degeneration in *tvrm76*. (A,B) Quantification of ONL nuclei relative to INL in the central and peripheral retinal regions, respectively. Significant loss of photoreceptors in *tvrm76* mice is observed compared to their wild-type littermates and *Dpagt1* rod photoreceptor knockouts at one month of age in the central retina, while peripheral loss becomes significant at 3 months. Values represent mean  $\pm$  SEM;  $n=3-6$  \*\* $p<0.01$ ; \*\*\* $p<0.001$ ; \*\*\*\* $p<0.0001$  (One-way ANOVA).

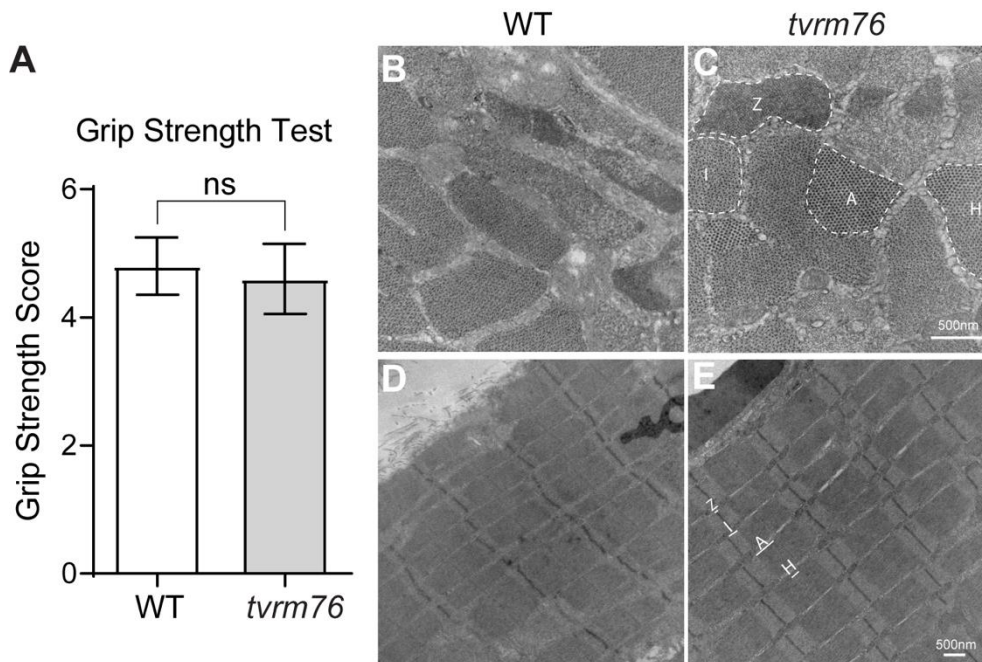

**Figure S2.** Grip strength and muscular architecture in *tvrm76* and littermate WT controls. (A) No significant difference in grip strength of *tvrm76* compared to wildtype controls at 1 month of age. Values represent mean  $\pm$  SEM;  $n=5$  ( $p=0.999$ , Student t-test). (B-E) Transmission electron microscopy of gastrocnemius muscle samples in transverse (B,C) and longitudinal (D,E) sections. No presence of tubular aggregates or abnormal features were observed in *tvrm76* mutants compared to littermate controls at 2 months of age. Z=Z-line, I=I-Band, A=A-Band, H=H-Zone.

**Table S1.** Primers for qPCR.

| <b>Gene</b>    | <b>Sequences (5' – 3')</b>  |
|----------------|-----------------------------|
| <i>Actb</i>    | F: CCAGTTCGCCATGGATGACGATAT |
|                | R: GTCAGGATACCTCTCTTGCTCTG  |
| <i>Atf4</i>    | F: TCGATGCTCTGTTTCGAATG     |
|                | R: AGAATGTAAAGGGGGCAACC     |
| <i>Hspa5</i>   | F: CCTCTCTGGTGATCAGGATA     |
|                | R: CGTGGAGAAGATCTGAGACT     |
| <i>Ddit3</i>   | F: CCACCACACCTGAAAGCAGAA    |
|                | R: AGGTGAAAGGCAGGGACTCA     |
| <i>Dpagt1</i>  | F: GGCCGGTCAGTCACTAGTCA     |
|                | R: GGTGTCTCCCACAAACACGC     |
| <i>Hsp90b1</i> | F: GATGGTCTGGCAACATGGAG     |
|                | R: CGCCTTGGTGTCTGGTAGAA     |
| <i>Padi2</i>   | F: CAAGATCAAGCCCCACCTGAT    |
|                | R: AGTTGCCCCAACCACTACTT     |
